# Supplementary material for: In situ synthesis of a hierarchical MIL-100(Fe)-modified nanofiber membrane for the efficient removal of levofloxacin
Source: Royal Society of Chemistry journal article supplement (doi:10.1039/d2nj06084a), 2023-01-01
Supplement: d2nj06084a1.pdf [file d2nj06084a1.pdf]

## Supplementary Information

### **In-situ synthesis of hierarchical MIL-100(Fe) modified nanofiber membrane for efficient removal of levofloxacin**

Tianyi Yang <sup>a1</sup>, Yakun Teng <sup>a1</sup>, Jing Wang <sup>a</sup>, Shushu Jia <sup>a</sup>, Yuqi Su <sup>a</sup>, Xiang Li <sup>\*a</sup>,

Lijuan Li <sup>b</sup>, Ce Wang <sup>a</sup>

<sup>a</sup> Alan G. MacDiarmid Institute, College of Chemistry, Jilin University, Changchun  
130012, PR China

<sup>b</sup> Department of Chemistry and Biochemistry, California State University, Long Beach,  
1250 Bellflower Blvd., Long Beach, CA 90840, USA

<sup>1</sup> These two authors contribute equally to this work.

\*Corresponding authors.

E-mail address: xiangli@jlu.edu.cn.

## Materials

Polyacrylonitrile (PAN,  $M_w = 8,000$ ) was obtained from Jilin Carbon Group. Chemical. N, N-dimethylformamide (DMF) (analytically pure), Ferric nitrate ( $\text{Fe}(\text{NO}_3)_3 \cdot 9\text{H}_2\text{O}$ ) (98.5% purity) and anhydrous ethanol were purchased from Tiantai Chemical Corporation. 1,3,5-Benzenetricarboxylic acid (BTC) (98% purity), Tris (hydroxymethyl) aminomethane hydrochloride (Tris) (>99% purity), Dopamine hydrochloride (DA) (98% purity) and Levofloxacin (LVX) (>98% purity) were purchased from Shanghai Aladdin Chemical Technology Co., Ltd.

## Characterization

The morphology and EDS of the fibers were observed with field emission scanning electron microscopy (SEM Shimadzu SSX-550) and transmission electron microscope (TEM; JEOL JEM-3010). The pH of the solution was measured by a pH meter (STARTER2100). X-ray diffraction (XRD) was measured by Rigaku D/Max 2500 diffractometer, Cu  $K\alpha$  radiation ( $\lambda = 1.54 \text{ \AA}$ ), generator voltage 40 kV, generator current 40 mA. Thermogravimetric analysis (TGA) was performed by TGA Instruments Q50, and the heating rate was  $5^\circ\text{C}/\text{min}$ . The existence of different functional groups was studied by Fourier transform infrared spectroscopy (FT-IR), and the spectrum was obtained on the Nicolet iS50 FT-IR spectrophotometer equipped with ATR. The absorbance of the solution was measured by UV-visible spectrophotometer (SHIMADZU UV-2501) at 290 nm, and the adsorption capacity was calculated. XPS spectra were recorded with high-resolution X-ray photoelectron spectroscopy (XPS,

ESCALAB250, Thermo Scientific). Zeta potential were characterized with zeta potential detecting instrument (Anton Paar, SurPASS).

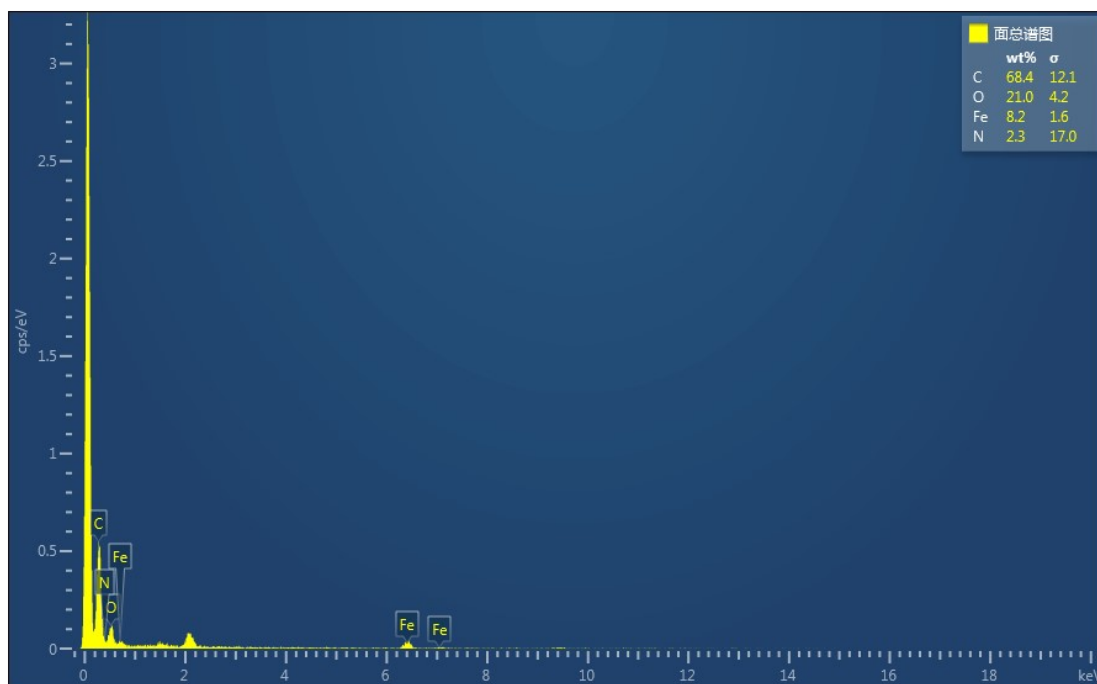

**Fig.S1.** EDS spectrum of MIL-100(Fe)-PNFM.

**Table S1.** The BET surface area and Pore size of different samples.

| Samples          | BET surface | Pore size (nm) |
|------------------|-------------|----------------|
| BTC-PNFM         | 5.24        | 4.98           |
| PDA-PNFM         | 13.44       | 4.94           |
| MIL-100(Fe)-PNFM | 129.24      | 3.90           |

### Equations:

$$q \text{ (mg/g)} = \frac{(C_0 - C_e)V}{W} \quad (1)$$

where  $C_0$  and  $C_e$  (mg/L) are the initial concentration and the equilibrium concentration of adsorbate in the measured solution respectively,  $V$  (L) is the volume of the measured solution, while  $W$  (g) is the weight of the added adsorbent.

Pseudo-first-order model:

$$\log(q_e - q_t) = \log q_e - \frac{k_1 t}{2.303} \quad (2)$$

Pseudo-second-order model:

$$\frac{t}{q_t} = \frac{1}{k_2 q_e^2} + \frac{t}{q_e} \quad (3)$$

Elovich model:

$$q_t = \frac{1}{\beta} \ln(\alpha\beta) + \frac{1}{\beta} \ln t \quad (4)$$

Where  $q_t$  (mg/g) and  $q_e$  represents the adsorption capacity at time  $t$  (h) and the equilibrium adsorption capacity,  $k_1$  ( $\text{h}^{-1}$ ) and  $k_2$  (g/mg/h) represents the pseudo-first-order rate constant, and the pseudo-second-order rate constant, while  $\alpha$  is the initial adsorption rate constant and  $\beta$  is the Elovich adsorption constant.

Langmuir isotherm:

$$\frac{1}{q_e} = \frac{1}{q_m} + \frac{1}{bq_m C_e} \quad (5)$$

Freundlich isotherm:

$$\log q_e = \log K_F + \frac{1}{n} \log C_e \quad (6)$$

Temkin isotherm:

$$q_e = K_T \ln C_e + K_T \ln f \quad (7)$$

where  $q_e$  is the equilibrium adsorption capacity (mg/g),  $C_e$  is the equilibrium concentration (mg/L),  $q_m$  and  $b$  are the maximum adsorption capacity and binding energy which related to the Langmuir constants, respectively;  $K_F$  and  $n$  respectively represent the empirical constants (L/mg) and Freundlich constant that related to the heterogeneity factor;  $K_T$  represents the Temkin constant (L/mg) related to the heat of adsorption, and  $f$  represents the maximum binding energy constant.
